# Supplementary material for: Colorimetric, turn-on fluorescence detection of fluoride ions using simple indole-based receptors in living cells
Source: Royal Society of Chemistry journal article supplement (doi:10.1039/c9ay00206e), 2019-01-01

**Colorimetric, Turn-on fluorescent detection of fluoride ions using simple indole  
based receptor in live cells.**

SHAO Juanjuan\*, WANG Linlin \*, Hu Yangfeng

College of Science & Technology, Hebei Agricultural University, Hebei Cangzhou, 061100,  
China

\*Corresponding author ; [juanjuanshao@aliyun.com](mailto:juanjuanshao@aliyun.com) (Shao) [lanxingcz@163.com](mailto:lanxingcz@163.com)  
(wang)

\*has equal contribution

Synthesis of FI-1:

1.09 mmol of Fluorescein hydrazide and 1.09 mmol of 3- formyl indole mixed with ethanol and the suspension was refluxed overnight in the presence of catalytic amount of acetic acid. The upon cooling the reaction mixture to room temperature, had thrown out colorless solid. FI-1: <sup>1</sup>H NMR (300 MHz, DMSO) δ 11.55 (s, 1H), 9.88 (s, 2H), 9.45 (s, 2H), 8.93 (s, 1H), 8.37 (d, *J* = 7.6 Hz, 1H), 8.02 – 7.91 (m, 1H), 7.75 (s, 1H), 7.65 (dd, *J* = 7.8, Hz, 1H), 7.50 (d, *J* = 7.9 Hz, 1H), 7.37 (d, *J* = 8.0 Hz, 1H), 7.18 (dd, *J* = 6.3 Hz, 2H), 7.00 (t, *J* = 7.5 Hz, 1H), 6.69 (d, *J* = 1.6 Hz, 1H), 6.59 – 6.44 (m, 2H). <sup>13</sup>C NMR (75 MHz, DMSO) δ 162.25, 157.88, 152.13, 148.59, 136.48, 132.73, 130.68, 130.26, 128.49, 127.78, 123.46, 122.02, 121.60, 119.84, 111.59, 111.18, 110.29, 101.75, 65.03. Mass (ESI): 474.3233(M+1), 473.1211( calculated)

Synthesis of FI-2:

The procedure used for synthesise FI-1 is followed here instead of 3- formyl indole, here we used N-methyl 3- formyl indole. FI-2: <sup>1</sup>H NMR (300 MHz, DMSO) δ 9.88 (s, 2H), 9.45 (s, 2H), 8.93 (s, 1H), 8.37 (d, *J* = 7.6 Hz, 1H), 8.01 – 7.91 (m, 1H), 7.74 (s, 1H), 7.65 (dd, *J* = 7.8, Hz,

1H), 7.50 (d,  $J = 7.9$  Hz, 1H), 7.37 (d,  $J = 8.0$  Hz, 1H), 7.18 (dd,  $J = 6.3$  Hz, 2H), 6.98(t,  $J = 7.5$  Hz, 1H), 6.69 (d,  $J = 1.6$  Hz, 1H), 6.59 – 6.42 (m, 2H). 3.6(s,3H). Mass (ESI): 459.1611(M+1), 458.1520 (calculated)

#### Synthesis of FB-1:

The procedure used for synthesizing FI-1 is followed here instead of 3- formyl indole, here we used N-methyl 3- formyl indole. FB-1:  $^1\text{H NMR}$  (300 MHz,  $\text{CDCl}_3$ )  $\delta$  9.11 (s, 9H), 8.63 (s, 4H), 7.41 – 7.33 (m, 9H), 7.32 (dd,  $J = 9.0, 5.1$  Hz, 11H), 7.26 (s, 3H), 7.15 – 7.08 (m, 10H), 6.94 (dd,  $J = 5.7, 2.1$  Hz, 4H), 6.56 (d,  $J = 2.2$  Hz, 7H), 6.38 (s, 2H), 6.36 (s, 4H), 6.30 (d,  $J = 2.3$  Hz, 5H), 6.28 (d,  $J = 2.3$  Hz, 3H). Mass (ESI): 409.7421(M+1), 407.3011 (calculated)

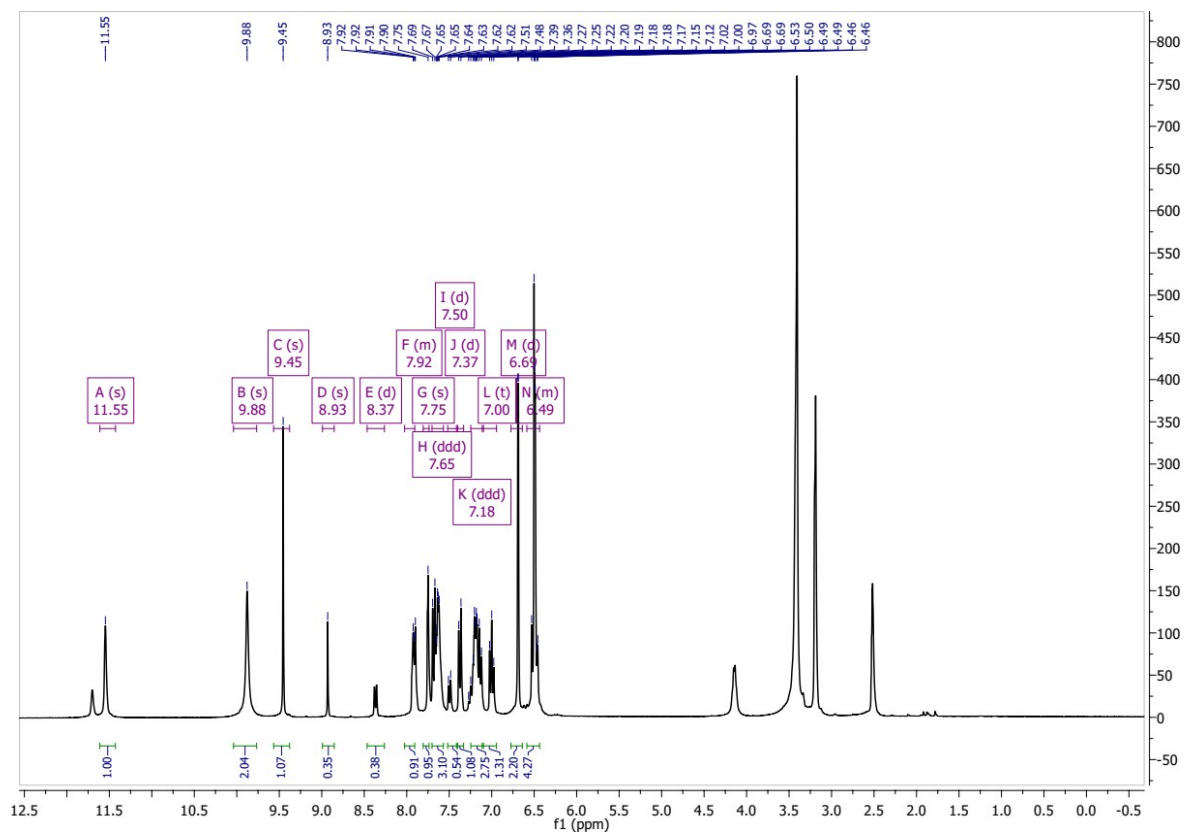

Fig-S1: <sup>1</sup>H-NMR of probe FI-1 in DMSO-d<sub>6</sub>.

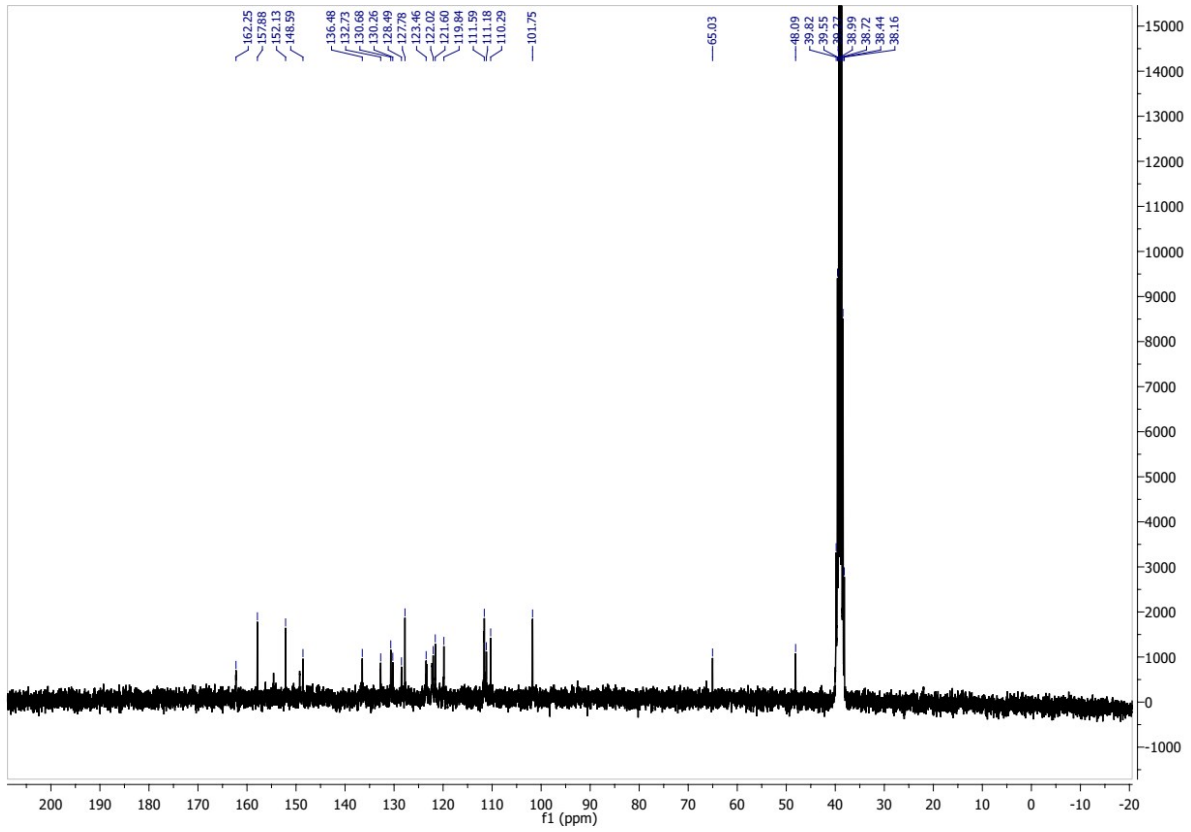

Fig-S2: <sup>13</sup>C-NMR of probe FI-1 in DMSO-d<sub>6</sub>.

S4 #117 RT: 1.78 AV: 1 NL: 1.21E3  
T: ITMS + c ESI Full ms [50.00-1500.00]

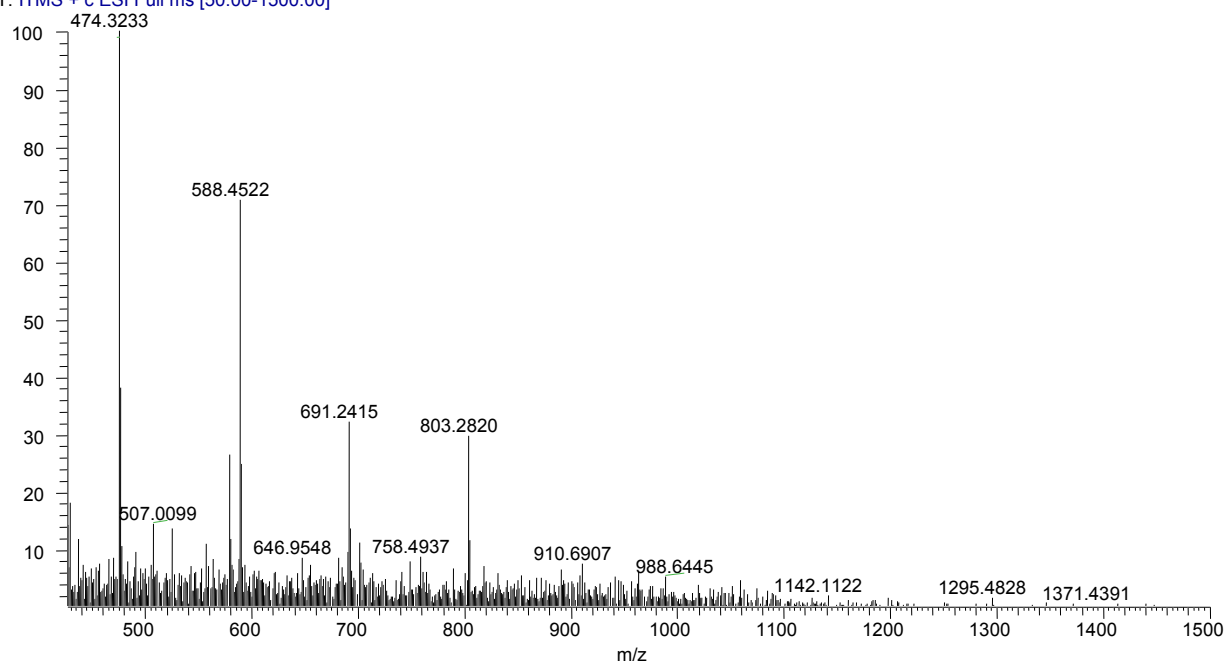

Fig-S3: ESI-MS spectrum of FI-1

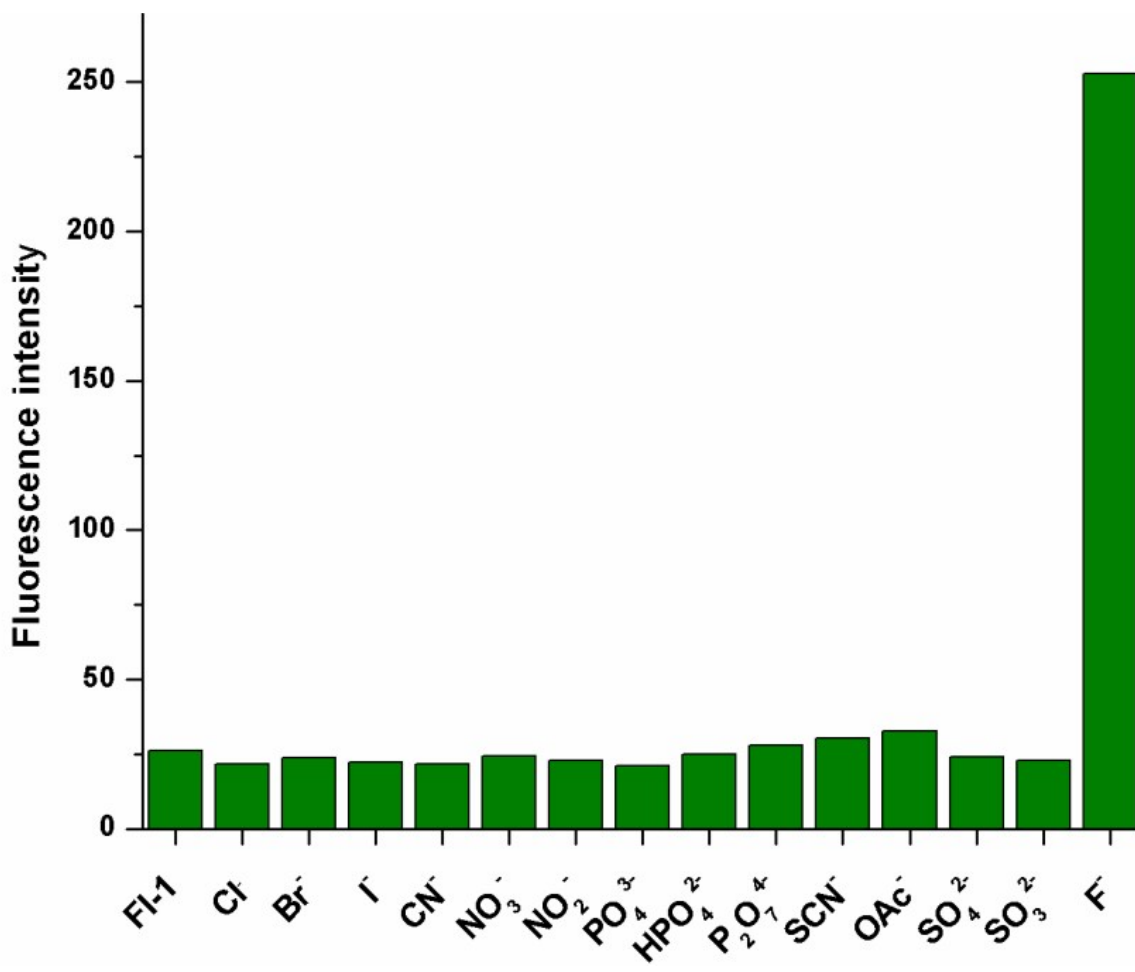

Fig S4: Fluorescence selectivity response of FI-1 with different anions.

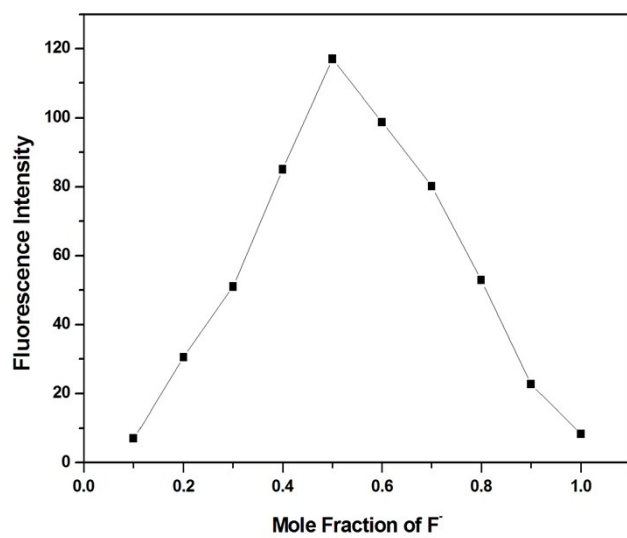

Figure S5: Jobs plot of fluoride ions Vs FI-1.

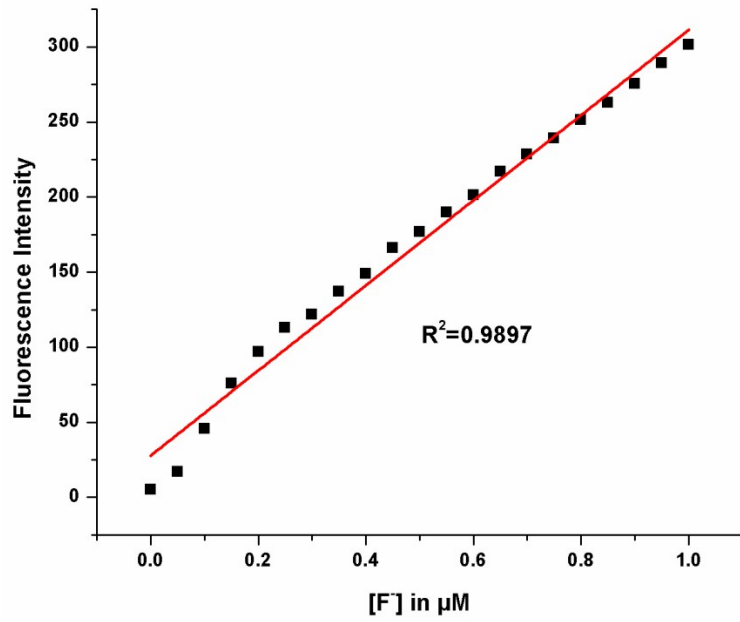

**Figure-S6 Plot of fluorescence intensity Vs concentration of fluoride ions added.**

**Fig-S7: <sup>19</sup>F-NMR of FI-1 with fluoride ions:**

**Table S1.** Determination of F<sup>-</sup> ion in real samples.

| Probe        | Sample      | F <sup>-</sup> spiked (μM) | Found F <sup>-</sup>                         | Recovery |
|--------------|-------------|----------------------------|----------------------------------------------|----------|
|              |             |                            | mean <sup>[a]</sup> ± SD <sup>[b]</sup> (μM) | (%)      |
| L<br>-120.84 | Tap water 1 | 10                         | 7.6 ± 0.01                                   | 76       |
|              | Tap water 2 | 15                         | 13.3 ± 0.15                                  | 86       |
|              | Tap water 3 | 20                         | 18 ± 0.10                                    | 90       |
|              | Urine- 1    | 10                         | 8.8 ± 0.01                                   | 88       |
|              | Urine-2     | 15                         | 14.0 ± 0.02                                  | 90       |
|              | Urine-3     | 20                         | 19.8 ± 0.11                                  | 99       |

<sup>a</sup>mean of three determination

<sup>b</sup>SD, standard deviation



**Table-S2: Comparison Chart of the fluoride detection methods with the existing methods.**

| Sl No | Sensor                          | Fluorescence switching | LoD                  | Reference |
|-------|---------------------------------|------------------------|----------------------|-----------|
| 1.    | N-imidazolyl- 1,8-naphthalimide | off                    | $5 \times 10^{-7}$ M | 1         |
| 2.    | Imidazophenazine                | Ratiometric            | 86 $\mu$ M           | 2         |
| 3.    | Coumarin tetrazole              | On                     | 207 nM               | 3         |
| 4.    | Silylated fluorescein           | On                     | 1 $\mu$ M            | 4         |
| 5.    | Fluorine triazolium ion         | On                     | 1 $\mu$ M            | 5         |
| 6     | Rhodamine-imidazole             | On                     | 8.52 nM              | 6         |

|   |                    |    |         |                 |
|---|--------------------|----|---------|-----------------|
| 7 | Fluorescein Indole | On | 31.8 nM | Present<br>work |
|---|--------------------|----|---------|-----------------|

References:

1. J. Wang, L. Yang, C. Hou, H. Cao., *Org. Biomol. Chem.*, 2012, 10, 6271
2. C. Wang, G. Li, Q. Zhang., *Tetrahedron Letters*, 2013, 54, 2633.
3. J. Y. Li, X. Q. Zhou, C. Yao. *Spectrochimica Acta –A*, 2013, 102, 66.
4. F. Zheng, X. Hou, S. Wu. *Chem. Eur. J.* 2013, 19, 936.
5. B. Sui, B. Kim, K. D. Belfield., *ACS Appl. Mater. Interfaces*, 2013, 5, 2920.
6. G. Sivaraman, D. Chellappa. *J. Mater. Chem. B*, 2013, 1, 5768-5772

**Fig-S8: Photograph of the probe FI-1 in aqueous solution without and with fluoride ions**

***FI-1 Alone***

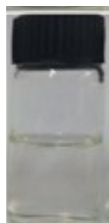

***FI-1 with F<sup>-</sup> ions***

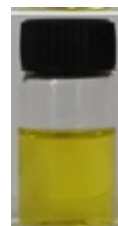

Supplement: c9ay00206e1.pdf [file c9ay00206e1.pdf]
